# Supplementary material for: Carbon trade-off with crop and water productivity in intensive rice-based cropping system in Eastern India
Source: Research Square preprint supplement (doi:10.21203/rs.3.rs-2376548/v1), 2022-12-16
Supplement: Supplementary file 1 [file 244c92c6f2931276d2dd558a.docx]

**Supplementary Materials**

**Table S1** Methodology used for analysis of soil samples

| Sl. No. | Parameters | Methods employed | Reference |
| --- | --- | --- | --- |
| 1 | Textural class | Bouyoucos Hydrometer Method | Bouyoucos (1962) |
| 2 | Bulk density | Core method | Blake (1965) |
| 3 | Water stable aggregates (WSA) | Wet sieving method | Kemper and Rosenau (1986) |
| 4 | pH (1: 2.5) | Glass electrode pH meter | Jackson (1973) |
| 5 | EC (dS m-1) at 25oC | Digital electrical Conductivity meter | Jackson (1973) |
| 6 | Organic carbon (%) | Modified Walkley and Black method | Jackson (1973) |
| 7 | Available N (kg ha-1) | Alkaline potassium permanganate (KMnO4) method | Subbiah and Asija, 1956 |
| 8 | Available P (kg ha-1) | Bray’s extractant method | Jackson (1973) |
| 9 | Available K (kg ha-1) | Ammonium acetate extractant method | Jackson (1973) |
| 10 | CO2 efflux | Inverted jar method | Witkamp (1966) |
| 11 | Total bacterial, fungal and actinomycetes population | Serial dilution and spread plate technique | - |
| 12 | Earthworm population | Quantitative extraction by formalin | Julka et al., 1993 |
| 13 | Microbial biomass carbon (MBC) | Modified chloroform fumigation-extraction method | Witt et al. (2000) |
| 14 | Microbial biomass nitrogen (MBN) | Fumigation-extraction method | Brookes *et al*. (1985) |
| 15 | Dehydrogenase activity (DHA) | Reduction of 2, 3, 5-triphenyl tetrazolium chloride (TTC) | Casida et al. (1964) |

**Table S2** Emission factors of agricultural inputs used in estimation of carbon footprints

| Particulars | Unit | kg CO2e unit-1 | References |
| --- | --- | --- | --- |
| Human labour | Day | 0.86 | Deng (1982) |
| Diesel | L | 3.32 | Deng (1982) |
| Farm machinery | Hr | 3.32 | Deng (1982) |
| Chemical fertilizers | | | |
| N | kg | 4.96 | Lal (2004) |
| P2O5 | kg | 1.35 | Lal (2004) |
| K2O | kg | 0.58 | Lal (2004) |
| Seed | kg | 1.22 | Wang et al. (2015) |
| Pesticides | | | |
| Fungicide | L | 3.9 | Lal (2004) |
| Herbicide | L | 6.3 | Lal (2004) |
| Insecticide | L | 5.1 | Lal (2004) |
